# Supplementary material
Source: MDPI journal article supplement (https://www.mdpi.com/1424-8247/14/11/1160)

**Figure S1.** Total Ion Current (TIC) chromatograms of irradiated (A) and non-irradiated RSV samples (B).

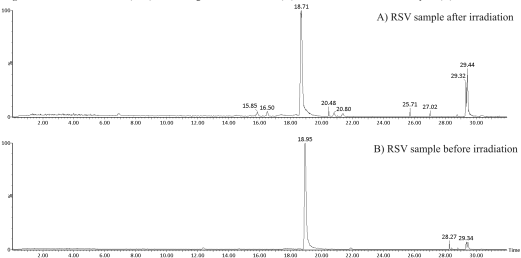

Supplement: s1 [file s1]
